# Supplementary material for: Effects of Chemical Modifications on the Thermoresponsive Behavior of a PDMAEA-b-PNIPAM-b-POEGA Triblock Terpolymer
Source: MDPI journal article supplement (doi:10.3390/polym12061382), 2020-06-19
Supplement: s1 [file s1]

Supplementary material

## Effects of chemical modifications on the thermoresponsive behavior of a PDMAEA-*b*-PNIPAM-*b*-POEGA triblock terpolymer

Despoina Giaouzi<sup>1</sup>, Stergios Pispas<sup>1,\*</sup>

<sup>1</sup>Theoretical and Physical Chemistry Institute, National Hellenic Research Foundation, 48 Vassileos Constantinou Avenue, Athens 11635, Greece; dgiaouzi@gmail.com

\* Correspondence: [pispas@eie.gr](mailto:pispas@eie.gr); Tel.: +30-210-727-3824

Received: date; Accepted: date; Published: date

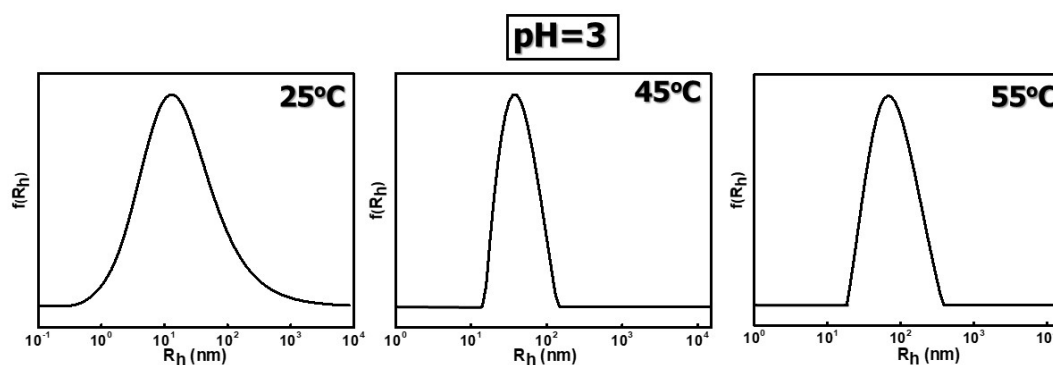

**Figure S1.** Hydrodynamic radius distributions from Contin analysis for PDMAEA<sub>20</sub>-*b*-PNIPAM<sub>11</sub>-*b*-POEGA<sub>18</sub> at acidic pH and at 25°C, 45°C, 55°C (DLS measurements were made at 90° angle).

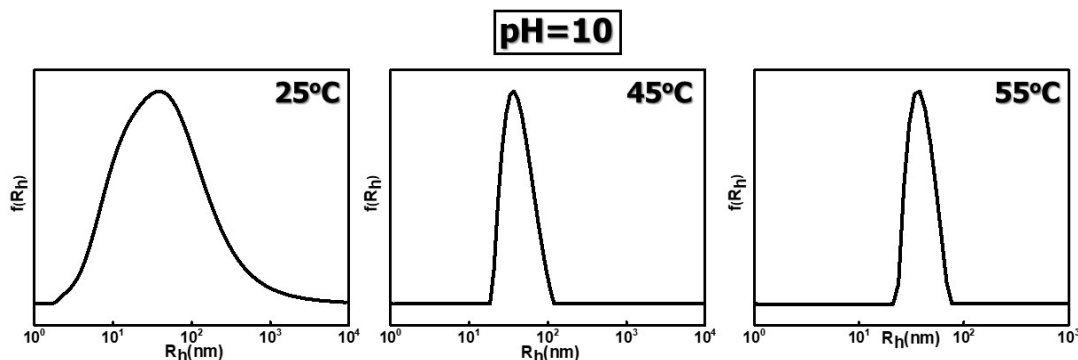

**Figure S2.** Hydrodynamic radius distributions from Contin analysis for PDMAEA<sub>20</sub>-*b*-PNIPAM<sub>11</sub>-*b*-POEGA<sub>18</sub> at acidic pH and at 25°C, 45°C, 55°C (DLS measurements were made at 90° angle).

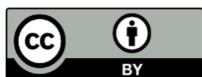

© 2020 by the authors. Submitted for possible open access publication under the terms and conditions of the Creative Commons Attribution (CC BY) license (<http://creativecommons.org/licenses/by/4.0/>).
